# Supplementary material for: Association between rainfall and diagnoses of joint or back pain: retrospective claims analysis
Source: PubMed Central journal article supplement — BMJ. 2017 Dec 13;359:j5326. doi: 10.1136/bmj.j5326 (PMC5728253; doi:10.1136/bmj.j5326), 2017-12-13
Supplement: jena040765.ww1.pdf [file jena040765.ww1.pdf]

**Online Supplement for “Feeling it in your bones: A retrospective claims analysis of the association between rainfall and diagnoses of joint or back pain”**

Anupam B. Jena, M.D., Ph.D.

Andrew R. Olenski, BS

Nolan Miller, Ph.D.

**Table of Contents**

**eTable 1**—ICD-9 Diagnosis Codes for Joint or Back Pain

**eTable 2**—Regression coefficients from visit-level multivariable linear probability model of joint/back pain visits as a function of daily rainfall (binary variable) and other model covariates

**eTable 1—ICD-9 Diagnosis Codes for Joint Pain**

| Condition                                | ICD-9 Codes                                                                                                                                                                                                                                                                                                                                                                                                                                                                                                                                                                                                                                                                                                                                                                                                                                                                                                                                                                                                                                                                                                                                                                                                                                                                                                                                                                                                                                                                                                                                                                                                                                                                                                                                                             |
|------------------------------------------|-------------------------------------------------------------------------------------------------------------------------------------------------------------------------------------------------------------------------------------------------------------------------------------------------------------------------------------------------------------------------------------------------------------------------------------------------------------------------------------------------------------------------------------------------------------------------------------------------------------------------------------------------------------------------------------------------------------------------------------------------------------------------------------------------------------------------------------------------------------------------------------------------------------------------------------------------------------------------------------------------------------------------------------------------------------------------------------------------------------------------------------------------------------------------------------------------------------------------------------------------------------------------------------------------------------------------------------------------------------------------------------------------------------------------------------------------------------------------------------------------------------------------------------------------------------------------------------------------------------------------------------------------------------------------------------------------------------------------------------------------------------------------|
| Rheumatoid arthritis and related disease | 7140, 7141, 7142, 71430, 71431, 71432, 71433, 7144, 71481, 71489, 7149, 7200                                                                                                                                                                                                                                                                                                                                                                                                                                                                                                                                                                                                                                                                                                                                                                                                                                                                                                                                                                                                                                                                                                                                                                                                                                                                                                                                                                                                                                                                                                                                                                                                                                                                                            |
| Osteoarthritis                           | 71500, 71504, 71509, 71510, 71511, 71512, 71513, 71514, 71515, 71516, 71517, 71518, 71520, 71521, 71522, 71523, 71524, 71525, 71526, 71527, 71528, 71530, 71531, 71532, 71533, 71534, 71535, 71536, 71537, 71538, 71580, 71589, 71590, 71591, 71592, 71593, 71594, 71595, 71596, 71597, 71598, V134                                                                                                                                                                                                                                                                                                                                                                                                                                                                                                                                                                                                                                                                                                                                                                                                                                                                                                                                                                                                                                                                                                                                                                                                                                                                                                                                                                                                                                                                     |
| Other non-traumatic joint disorders      | 7130, 7131, 7132, 7133, 7134, 7135, 7136, 7137, 7138, 71600, 71601, 71602, 71603, 71604, 71605, 71606, 71607, 71608, 71609, 71620, 71621, 71622, 71623, 71624, 71625, 71626, 71627, 71628, 71629, 71630, 71631, 71632, 71633, 71634, 71635, 71636, 71637, 71638, 71639, 71640, 71641, 71642, 71643, 71644, 71645, 71646, 71647, 71648, 71649, 71650, 71651, 71652, 71653, 71654, 71655, 71656, 71657, 71658, 71659, 71660, 71661, 71662, 71663, 71664, 71665, 71666, 71667, 71668, 71680, 71681, 71682, 71683, 71684, 71685, 71686, 71687, 71688, 71689, 71690, 71691, 71692, 71693, 71694, 71695, 71696, 71697, 71698, 71699, 71810, 71811, 71812, 71813, 71814, 71815, 71817, 71818, 71819, 71820, 71821, 71822, 71823, 71824, 71825, 71826, 71827, 71828, 71829, 71850, 71851, 71852, 71853, 71854, 71855, 71856, 71857, 71858, 71859, 71860, 71865, 71870, 71871, 71872, 71873, 71874, 71875, 71876, 71877, 71878, 71879, 71880, 71881, 71882, 71883, 71884, 71885, 71886, 71887, 71888, 71889, 71890, 71891, 71892, 71893, 71894, 71895, 71897, 71898, 71899, 71900, 71901, 71902, 71903, 71904, 71905, 71906, 71907, 71908, 71909, 71910, 71911, 71912, 71913, 71914, 71915, 71916, 71917, 71918, 71919, 71920, 71921, 71922, 71923, 71924, 71925, 71926, 71927, 71928, 71929, 71930, 71931, 71932, 71933, 71934, 71935, 71936, 71937, 71938, 71939, 71940, 71941, 71942, 71943, 71944, 71945, 71946, 71947, 71948, 71949, 71950, 71951, 71952, 71953, 71954, 71955, 71956, 71957, 71958, 71959, 71960, 71961, 71962, 71963, 71964, 71965, 71966, 71967, 71968, 71969, 7197, 71970, 71975, 71976, 71977, 71978, 71979, 71980, 71981, 71982, 71983, 71984, 71985, 71986, 71987, 71988, 71989, 71990, 71991, 71992, 71993, 71994, 71995, 71996, 71997, 71998, 71999 |

**eTable 2**—Regression coefficients from visit-level multivariable linear probability model of joint/back pain visits as a function of daily rainfall (binary variable) and other model covariates

| Variable                                              | Coefficient from linear probability model | 95% CI (lower) | 95% CI (upper) | p-value |
|-------------------------------------------------------|-------------------------------------------|----------------|----------------|---------|
| Rain (yes vs no)                                      | -0.00039                                  | -0.00079       | 6.02E-06       | 0.054   |
| Age (each 1 year increment)                           | 0.000257                                  | 0.000205       | 0.000309       | 0       |
| Female (yes vs no)                                    | 0.01362                                   | 0.012941       | 0.014299       | 0       |
| White (yes vs no)                                     | -0.0063                                   | -0.00838       | -0.00422       | 0       |
| <b>Chronic condition indicator variables</b>          |                                           |                |                |         |
| Coronary artery disease (yes vs no)                   | 0.003596                                  | 0.002916       | 0.004277       | 0       |
| Dementia (yes vs no)                                  | -0.00147                                  | -0.00241       | -0.00054       | 0.002   |
| Atrial Fibrillation (yes vs no)                       | -0.01743                                  | -0.01835       | -0.0165        | 0       |
| Chronic Kidney Disease (yes vs no)                    | -0.00515                                  | -0.00593       | -0.00437       | 0       |
| Chronic Obstructive Pulmonary Disease (yes vs no)     | -0.00138                                  | -0.00222       | -0.00055       | 0.001   |
| Diabetes (yes vs no)                                  | -0.01124                                  | -0.01193       | -0.01055       | 0       |
| Congestive Heart Failure (yes vs no)                  | -0.00237                                  | -0.00314       | -0.0016        | 0       |
| Hyperlipidemia (yes vs no)                            | -0.00551                                  | -0.0064        | -0.00461       | 0       |
| Hypertension (yes vs no)                              | -0.01767                                  | -0.01875       | -0.0166        | 0       |
| Prior Stroke or Transient Ischemic Attack (yes vs no) | -0.0026                                   | -0.00331       | -0.00189       | 0       |
| Cancer (yes vs no)                                    | -0.00467                                  | -0.00539       | -0.00396       | 0       |

**Notes:** Regression coefficients in a linear probability model reflect the percentage point change in the probability of the outcome variable (in this case, the probability that a primary care visit involved joint/back pain) as a function of 0/1 change in binary variables (e.g., yes/no presence of rain on a given day) or a unit change in continuous variables (e.g., age).
